# Supplementary material for: Scientific Validation of the Traditional Anti-Inflammatory Use of the Sapindus mukorossi Seed Kernel: In Vitro and In Silico Insights
Source: Research Square preprint supplement (doi:10.21203/rs.3.rs-8101955/v1), 2026-01-28
Supplement: Supplementary file 1 [file e60ae1800945be3400f47ce7.docx]

**Supplementary Table 1.**

| **R. Time** | **Score** | **Compound Name** | **ION** | **Formula** | **Hit Score** | **2D Structure** |
| --- | --- | --- | --- | --- | --- | --- |
| 1.42 | 0.1976 | 7-Hydroxymitragynine | [M+H]+ | C23H30N2O5 | 4 | 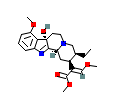 |
| 1.50 | 0.1503 | (S,S)-(+)-Tetrandrine | [M+H]+ | C38H42N2O6 | 4 | 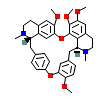 |
| 1.68 | 0.4044 | 5-Hydroxytryptophan | [M+H]+ | C11H12N2O3 | 3 | 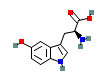 |
| 14.28 | 0.2709 | Gardneramine | [M+H]+ | C23H28N2O5 | 4 | 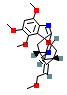 |
| 15.24 | 0.1489 | Aconitine | [M+H]+ | C34H47NO11 | 9 | 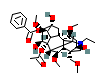 |
| 15.44 | 0.1525 | Chrysanthellin B | [M+H]+ | C58H94O26 | 8 | 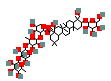 |
| 15.70 | 0.2243 | Vitexin | [M+H]+ | C21H20O10 | 4 | 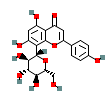 |
| 15.91 | 0.2003 | Isosilybin A | [M+H]+ | C25H22O10 | 6 | 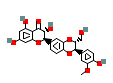 |
| 18.18 | 0.1340 | Oxyacanthine | [M+H]+ | C37H40N2O6 | 6 | 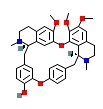 |
| 19.80 | 0.1327 | Thalsimidine | [M+H]+ | C37H38N2O7 | 10 | 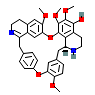 |
| 20.02 | 0.8144 | Lycorine-diacetate | [M+H]+ | C20H21NO6 | 4 | 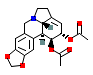 |
| 20.32 | 0.0638 | Luteolin 6-C-glucoside 8-C-arabinoside | [M+H]+ | C27H30O16 | 4 | 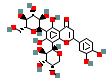 |
| 20.45 | 0.1031 | Aconitine | [M+H]+ | C34H47NO11 | 4 | 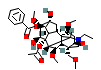 |
| 21.06 | 0.1055 | (+)-Tubocurarine chloride | [M+H]+ | C37H40N2O6 | 3 | 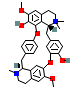 |
| 22.51 | 0.1342 | Apigenin-8-C-glucoside-2'-rhamnoside | [M+H]+ | C27H30O14 | 3 | 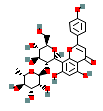 |
| 22.84 | 0.3697 | (-)-Podophyllotoxin | [M+H]+ | C22H22O8 | 2 | 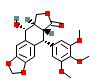 |
| 26.17 | 0.1741 | (+)-Tubocurarine chloride | [M+H]+ | C37H40N2O6 | 6 | 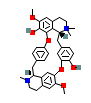 |
| 26.58 | 0.3589 | Ginsenoside compound K | [M+H]+ | C36H62O8 | 2 | 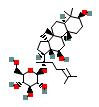 |
| 29.11 | 0.1729 | isosakuranetin-7-O-rutinoside | [M+H]+ | C28H34O14 | 6 | 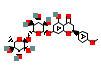 |
| 29.26 | 0.3588 | Orientin | [M+H]+ | C21H20O11 | 4 | 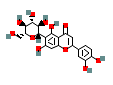 |
| 32.20 | 0.2065 | Furostane base -2H + O-Hex, O-Hex-Hex-dHex | [M+H]+ | C51H84O23 | 5 | 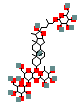 |
| 33.70 | 0.3868 | Brucine | [M+H]+ | C23H26N2O4 | 5 | 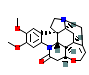 |

**Table 1.** LC–MS identified compounds from *S. mukorossi* extract with retention time, formula, ionization mode, and hit score.
